# Supplementary material for: Circulating miRNA As Prognostic Biomarker During Estrus of Buffalo
Source: Preprints.org preprint supplement (doi:10.20944/preprints202306.0370.v1), 2023-06-06
Supplement: Supplementary file 3 [file supplementary]

## Sheet: Index
Table	Legend
Supplementary Table S1	miRNA FPKM values
Supplementary Table S2	Basic statistics of quality control of Reads

## Sheet: Supplementary Table S1
	R5069_1	R5069_2	R5195_1	R5195_2	R5248_1	R5248_2	R5332_1	R5332_2	R5380_1	R5380_2	R5069_1_normalised expression	R5069_2_normalised expression	R5195_1_normalised expression	R5195_2_normalised expression	R5248_1_normalised expression	R5248_2_normalised expression	R5332_1_normalised expression	R5332_2_normalised expression	R5380_1_normalised expression	R5380_2_normalised expression
let-7	1520580	1048079	1361218	1763578	1050264	1504073	2411482	1233757	966459	1086400	82500	98400	82600	105000	60000	105000	70900	75300	60100	98200
mir-1	27628	5337	24542	10570	3218	9086	27760	12475	2854	5656	1499.78	500.9	1489.04	626.66	183.81	631.81	816.74	761.34	177.41	511.3
mir-10	27174	16376	24270	15512	8142	13302	32412	6267	7449	17140	1475.14	1536.95	1472.54	919.66	465.07	924.98	953.61	382.47	463.05	1549.44
mir-100	903	671	806	1410	806	1221	1612	726	732	722	49.02	62.98	48.9	83.59	46.04	84.9	47.43	44.31	45.5	65.27
mir-101	84576	59112	75410	103866	102044	88683	177454	134316	93849	61688	4591.19	5547.88	4575.36	6157.91	5828.75	6166.72	5220.96	8197.21	5833.89	5576.52
mir-10162	9	5	10	10	0	6	10	5	7	6	0.49	0.47	0.61	0.59	0	0.42	0.29	0.31	0.44	0.54
mir-10164	62	89	62	4	14	2	76	1	15	74	3.37	8.35	3.76	0.24	0.8	0.14	2.24	0.06	0.93	6.69
mir-10167	34	37	28	76	18	55	46	35	21	40	1.85	3.47	1.7	4.51	1.03	3.82	1.35	2.14	1.31	3.62
mir-10172	61	75	50	160	122	124	172	400	108	72	3.31	7.04	3.03	9.49	6.97	8.62	5.06	24.41	6.71	6.51
mir-10173	1	0	2	0	0	0	2	0	1	0	0.05	0	0.12	0	0	0	0.06	0	0.06	0
mir-10174	7358	903	6566	2444	2854	2040	9420	1859	2599	950	399.43	84.75	398.38	144.9	163.02	141.85	277.15	113.45	161.56	85.88
mir-10175	31	16	34	4	2	7	36	2	3	18	1.68	1.5	2.06	0.24	0.11	0.49	1.06	0.12	0.19	1.63
mir-10182	1	0	0	0	0	0	0	0	0	0	0.05	0	0	0	0	0	0	0	0	0
mir-10225	3	3	2	38	22	35	24	1	15	4	0.16	0.28	0.12	2.25	1.26	2.43	0.71	0.06	0.93	0.36
mir-103	53818	27389	48448	34142	39226	29020	87674	34712	35967	28606	2921.5	2570.56	2939.49	2024.18	2240.59	2017.95	2579.5	2118.45	2235.8	2585.95
mir-10394	0	2	0	0	0	0	0	1	0	2	0	0.19	0	0	0	0	0	0.06	0	0.18
mir-10395	177	122	164	88	148	75	312	278	119	138	9.61	11.45	9.95	5.22	8.45	5.22	9.18	16.97	7.4	12.48
mir-105	5	0	4	4	0	3	4	2	0	0	0.27	0	0.24	0.24	0	0.21	0.12	0.12	0	0
mir-10527	0	8	0	0	0	0	0	0	1	14	0	0.75	0	0	0	0	0	0	0.06	1.27
mir-106	12393	4223	10968	8744	11878	7276	22846	11348	10848	4416	672.75	396.34	665.46	518.41	678.47	505.95	672.16	692.56	674.34	399.2
mir-107	53343	27335	48022	33574	38070	28575	86092	32946	34787	28566	2895.71	2565.49	2913.64	1990.51	2174.56	1987.01	2532.95	2010.67	2162.45	2582.33
mir-10926	3250	3498	2910	2474	3222	2085	6132	18820	2901	3526	176.43	328.3	176.56	146.68	184.04	144.98	180.41	1148.57	180.33	318.75
mir-10955	2	0	0	0	0	0	0	2	1	0	0.11	0	0	0	0	0	0	0.12	0.06	0
mir-1185	0	0	0	0	0	2	0	3	0	0	0	0	0	0	0	0.14	0	0.18	0	0
mir-1197	0	0	0	2	0	1	0	2	0	0	0	0	0	0.12	0	0.07	0	0.12	0	0
mir-11971	0	3	0	0	0	0	0	2	0	2	0	0.28	0	0	0	0	0	0.12	0	0.18
mir-11982	39	119	24	24	12	24	36	13	12	126	2.12	11.17	1.46	1.42	0.69	1.67	1.06	0.79	0.75	11.39
mir-11986	18	10	24	18	70	19	94	52	67	10	0.98	0.94	1.46	1.07	4	1.32	2.77	3.17	4.16	0.9
mir-11991	49	17	64	114	84	85	148	163	75	22	2.66	1.6	3.88	6.76	4.8	5.91	4.35	9.95	4.66	1.99
mir-11992	26	7	24	22	18	31	42	113	17	8	1.41	0.66	1.46	1.3	1.03	2.16	1.24	6.9	1.06	0.72
mir-11995	5	0	2	4	0	3	2	1	0	0	0.27	0	0.12	0.24	0	0.21	0.06	0.06	0	0
mir-11997	2	2	0	0	8	0	8	2	4	2	0.11	0.19	0	0	0.46	0	0.24	0.12	0.25	0.18
mir-12002	1	0	2	0	0	0	2	0	0	0	0.05	0	0.12	0	0	0	0.06	0	0	0
mir-12003	2	0	0	0	0	2	0	8	0	0	0.11	0	0	0	0	0.14	0	0.49	0	0
mir-12006	2	0	4	4	0	2	4	8	0	0	0.11	0	0.24	0.24	0	0.14	0.12	0.49	0	0
mir-12013	2	0	0	2	0	1	0	0	0	0	0.11	0	0	0.12	0	0.07	0	0	0	0
mir-12017	1	3	2	0	0	0	2	0	0	0	0.05	0.28	0.12	0	0	0	0.06	0	0	0
mir-12018	0	0	0	2	0	1	0	1	0	0	0	0	0	0.12	0	0.07	0	0.06	0	0
mir-12020	1	3	0	0	0	0	0	0	0	4	0.05	0.28	0	0	0	0	0	0	0	0.36
mir-12023	0	3	0	0	0	0	0	1	0	0	0	0.28	0	0	0	0	0	0.06	0	0
mir-12031	8	13	6	18	2	12	8	1	1	6	0.43	1.22	0.36	1.07	0.11	0.83	0.24	0.06	0.06	0.54
mir-12033	0	0	0	2	0	1	0	0	0	0	0	0	0	0.12	0	0.07	0	0	0	0
mir-12036	0	7	0	0	0	0	0	0	0	10	0	0.66	0	0	0	0	0	0	0	0.9
mir-12041	0	0	0	0	0	1	0	1	0	0	0	0	0	0	0	0.07	0	0.06	0	0
mir-12042	24	71	30	52	14	49	44	19	14	54	1.3	6.66	1.82	3.08	0.8	3.41	1.29	1.16	0.87	4.88
mir-12060	1	0	0	0	0	0	0	1	0	0	0.05	0	0	0	0	0	0	0.06	0	0
mir-12061	4	0	4	0	0	1	4	1	0	0	0.22	0	0.24	0	0	0.07	0.12	0.06	0	0
mir-122	130	1260	108	306	122	232	230	99	115	1346	7.06	118.26	6.55	18.14	6.97	16.13	6.77	6.04	7.15	121.68
mir-1224	1	2	2	0	0	0	2	1	0	0	0.05	0.19	0.12	0	0	0	0.06	0.06	0	0
mir-124	72	42	66	44	52	36	118	76	42	50	3.91	3.94	4	2.61	2.97	2.5	3.47	4.64	2.61	4.52
mir-1244	0	4	0	0	0	0	0	0	0	0	0	0.38	0	0	0	0	0	0	0	0
mir-1246	30	906	24	462	2	410	26	183	2	918	1.63	85.03	1.46	27.39	0.11	28.51	0.76	11.17	0.12	82.99
mir-1248	99	71	84	60	38	60	122	34	40	70	5.37	6.66	5.1	3.56	2.17	4.17	3.59	2.07	2.49	6.33
mir-1249	411	484	394	252	254	207	648	248	220	472	22.31	45.43	23.91	14.94	14.51	14.39	19.07	15.14	13.68	42.67
mir-125	10612	13863	9432	8400	4474	7127	13906	1049	4094	14522	576.07	1301.09	572.27	498.01	255.55	495.59	409.13	64.02	254.49	1312.77
mir-1251	0	0	0	0	0	1	0	0	0	0	0	0	0	0	0	0.07	0	0	0	0
mir-126	688	352	600	732	636	623	1236	507	565	354	37.35	33.04	36.4	43.4	36.33	43.32	36.36	30.94	35.12	32
mir-1260	5828	2656	5210	2216	6438	1964	11648	17782	5867	2712	316.37	249.28	316.11	131.38	367.74	136.57	342.7	1085.22	364.71	245.16
mir-1264	0	0	0	2	0	1	0	0	0	0	0	0	0	0.12	0	0.07	0	0	0	0
mir-127	412	486	356	872	900	733	1256	1247	815	506	22.37	45.61	21.6	51.7	51.41	50.97	36.95	76.1	50.66	45.74
mir-1271	4368	4520	3820	5666	3576	4734	7396	2955	3247	4618	237.12	424.22	231.77	335.92	204.26	329.19	217.6	180.34	201.84	417.46
mir-1277	45	11	40	68	46	60	86	232	37	8	2.44	1.03	2.43	4.03	2.63	4.17	2.53	14.16	2.3	0.72
mir-128	33615	88552	30362	45526	9092	39162	39454	6078	8524	91778	1824.78	8310.93	1842.16	2699.1	519.33	2723.19	1160.79	370.94	529.87	8296.62
mir-1285	0	14	0	0	4	1	4	7	2	14	0	1.31	0	0	0.23	0.07	0.12	0.43	0.12	1.27
mir-129	385	384	370	440	684	384	1054	1498	617	390	20.9	36.04	22.45	26.09	39.07	26.7	31.01	91.42	38.35	35.26
mir-1291	34	20	32	2	2	7	34	7	5	22	1.85	1.88	1.94	0.12	0.11	0.49	1	0.43	0.31	1.99
mir-1296	46	15	38	20	42	14	80	15	37	12	2.5	1.41	2.31	1.19	2.4	0.97	2.35	0.92	2.3	1.08
mir-1298	27	32	22	32	32	27	54	25	24	34	1.47	3	1.33	1.9	1.83	1.88	1.59	1.53	1.49	3.07
mir-130	854	3507	730	1508	268	1263	998	277	271	3566	46.36	329.14	44.29	89.4	15.31	87.82	29.36	16.91	16.85	322.36
mir-1306	897	1627	732	650	326	529	1058	350	275	1616	48.69	152.7	44.41	38.54	18.62	36.78	31.13	21.36	17.09	146.08
mir-1307	8983	17338	8068	6570	3356	5555	11424	3742	3122	17774	487.64	1627.24	489.51	389.52	191.69	386.28	336.11	228.37	194.07	1606.75
mir-132	253	108	196	226	272	223	468	223	242	96	13.73	10.14	11.89	13.4	15.54	15.51	13.77	13.61	15.04	8.68
mir-133	2912	542	2566	554	220	458	2786	362	181	592	158.08	50.87	155.69	32.85	12.57	31.85	81.97	22.09	11.25	53.52
mir-1338	382	109	292	640	224	542	516	186	203	104	20.74	10.23	17.72	37.94	12.79	37.69	15.18	11.35	12.62	9.4
mir-134	2	0	0	0	0	0	0	1	0	0	0.11	0	0	0	0	0	0	0.06	0	0
mir-1343	1549	5425	1424	1072	494	865	1918	425	439	5690	84.09	509.16	86.4	63.56	28.22	60.15	56.43	25.94	27.29	514.37
mir-135	31	16	40	32	24	27	64	25	19	18	1.68	1.5	2.43	1.9	1.37	1.88	1.88	1.53	1.18	1.63
mir-136	63	38	46	256	290	237	336	306	234	48	3.42	3.57	2.79	15.18	16.56	16.48	9.89	18.67	14.55	4.34
mir-137	1	4	0	2	6	2	6	4	7	4	0.05	0.38	0	0.12	0.34	0.14	0.18	0.24	0.44	0.36
mir-138	189	52	180	886	1182	722	1362	1725	1072	42	10.26	4.88	10.92	52.53	67.52	50.21	40.07	105.28	66.64	3.8
mir-1388	6660	3340	5914	13382	3554	11484	9468	3029	3313	3430	361.54	313.47	358.82	793.38	203	798.56	278.56	184.86	205.94	310.07
mir-139	811	524	724	628	300	532	1024	248	293	538	44.02	49.18	43.93	37.23	17.14	36.99	30.13	15.14	18.21	48.63
mir-140	94412	110253	84024	82154	92710	69625	176734	132608	85364	115160	5125.14	10300	5097.99	4870.67	5295.59	4841.49	5199.77	8092.97	5306.45	10400
mir-141	30	38	26	52	102	50	128	164	84	34	1.63	3.57	1.58	3.08	5.83	3.48	3.77	10.01	5.22	3.07
mir-142	346695	72078	310196	349880	312206	298759	622402	316792	286618	74806	18800	6764.79	18800	20700	17800	20800	18300	19300	17800	6762.37
mir-143	4315	2341	3848	3870	2872	3271	6720	2377	2603	2462	234.24	219.71	233.47	229.44	164.05	227.45	197.71	145.07	161.81	222.56
mir-1434	6	27	6	14	10	14	16	15	7	24	0.33	2.53	0.36	0.83	0.57	0.97	0.47	0.92	0.44	2.17
mir-144	974	2002	878	1856	1270	1577	2148	1452	1205	2138	52.87	187.9	53.27	110.04	72.54	109.66	63.2	88.61	74.91	193.27
mir-145	46	37	42	38	20	37	62	16	23	40	2.5	3.47	2.55	2.25	1.14	2.57	1.82	0.98	1.43	3.62
mir-146	9171	3006	8122	7794	6150	6795	14272	3044	5589	3126	497.85	282.12	492.79	462.08	351.29	472.5	419.9	185.77	347.43	282.59
mir-1468	2408	2269	2174	3134	948	2771	3122	1023	887	2336	130.72	212.95	131.9	185.81	54.15	192.69	91.85	62.43	55.14	211.17
mir-147	3090	1025	2724	1712	1866	1440	4590	1804	1701	1084	167.74	96.2	165.27	101.5	106.59	100.13	135.04	110.1	105.74	97.99
mir-148	864252	180141	772882	950470	780508	811173	1553390	1787698	717645	187850	46900	16900	46900	56400	44600	56400	45700	109000	44600	17000
mir-149	44	43	34	26	22	27	56	12	17	44	2.39	4.04	2.06	1.54	1.26	1.88	1.65	0.73	1.06	3.98
mir-15	9743	2023	8788	4692	5946	4010	14734	5841	5415	2110	528.9	189.87	533.19	278.18	339.64	278.84	433.5	356.47	336.61	190.74
mir-150	441990	390305	394402	384712	337348	327930	731750	138804	310261	404650	24000	36600	23900	22800	19300	22800	21500	8471.11	19300	36600
mir-151	188534	139636	168758	143860	86134	122529	254892	223508	79516	145080	10200	13100	10200	8529.04	4919.97	8520.26	7499.29	13600	4942.92	13100
mir-152	1973	193	1774	540	640	488	2414	1083	588	204	107.1	18.11	107.63	32.02	36.56	33.93	71.02	66.09	36.55	18.44
mir-153	3	5	4	2	14	2	18	16	15	6	0.16	0.47	0.24	0.12	0.8	0.14	0.53	0.98	0.93	0.54
mir-154	88	123	90	1176	512	1022	602	497	451	128	4.78	11.54	5.46	69.72	29.25	71.07	17.71	30.33	28.04	11.57
mir-155	25844	19888	23126	27870	13026	23944	36152	14670	11992	20746	1402.94	1866.56	1403.13	1652.33	744.04	1664.99	1063.64	895.3	745.45	1875.41
mir-1584	0	1	0	0	0	0	0	0	0	2	0	0.09	0	0	0	0	0	0	0	0.18
mir-1587	0	0	0	0	2	0	2	1	1	0	0	0	0	0	0.11	0	0.06	0.06	0.06	0
mir-16	40317	14851	35828	26168	40656	22234	76484	30687	37045	15652	2188.6	1393.82	2173.79	1551.42	2322.27	1546.08	2250.27	1872.81	2302.81	1414.92
mir-17	8558	2581	7522	5138	6312	4358	13834	4837	5708	2712	464.57	242.24	456.38	304.62	360.54	303.04	407.02	295.2	354.82	245.16
mir-18	651	396	588	430	486	361	1074	397	446	402	35.34	37.17	35.68	25.49	27.76	25.1	31.6	24.23	27.72	36.34
mir-181	99461	72495	88978	101532	64844	86737	153822	22272	59499	75478	5399.22	6803.92	5398.57	6019.54	3703.89	6031.4	4525.67	1359.24	3698.61	6823.12
mir-182	29	22	26	48	30	35	56	31	20	26	1.57	2.06	1.58	2.85	1.71	2.43	1.65	1.89	1.24	2.35
mir-183	11	28	8	20	34	18	42	29	27	32	0.6	2.63	0.49	1.19	1.94	1.25	1.24	1.77	1.68	2.89
mir-1839	7821	5745	6988	7638	4748	6445	11736	6077	4453	6096	424.56	539.19	423.98	452.83	271.21	448.16	345.29	370.87	276.81	551.07
mir-184	96	71	82	86	92	75	174	61	82	76	5.21	6.66	4.98	5.1	5.26	5.22	5.12	3.72	5.1	6.87
mir-1842	0	0	0	0	2	0	2	1	1	0	0	0	0	0	0.11	0	0.06	0.06	0.06	0
mir-1843	11	23	8	18	0	12	8	6	0	22	0.6	2.16	0.49	1.07	0	0.83	0.24	0.37	0	1.99
mir-185	9501	17393	8632	9170	5994	7860	14626	4705	5547	17966	515.76	1632.4	523.73	543.66	342.38	546.56	430.32	287.14	344.82	1624.11
mir-186	73424	39345	66570	62964	53242	53411	119812	51362	49136	40850	3985.81	3692.67	4039.01	3732.95	3041.18	3714.02	3525.04	3134.59	3054.42	3692.79
mir-187	8	7	6	14	14	7	20	13	8	8	0.43	0.66	0.36	0.83	0.8	0.49	0.59	0.79	0.5	0.72
mir-188	18	13	12	12	26	9	38	13	23	14	0.98	1.22	0.73	0.71	1.49	0.63	1.12	0.79	1.43	1.27
mir-1895	0	0	0	0	6	0	6	5	5	0	0	0	0	0	0.34	0	0.18	0.31	0.31	0
mir-19	7830	2001	7064	8572	17600	7298	24664	10784	16501	2008	425.05	187.8	428.59	508.21	1005.31	507.48	725.65	658.14	1025.74	181.52
mir-190	72	72	78	118	136	105	214	96	118	82	3.91	6.76	4.73	7	7.77	7.3	6.3	5.86	7.34	7.41
mir-191	389891	252272	350498	277270	141148	235856	491646	79236	129243	262486	21200	23700	21300	16400	8062.37	16400	14500	4835.72	8034.08	23700
mir-192	29016	17714	25898	40828	36792	34919	62690	43341	33756	18420	1575.13	1662.52	1571.31	2420.57	2101.56	2428.15	1844.43	2645.07	2098.36	1665.15
mir-193	565	992	502	502	486	421	988	861	454	1004	30.67	93.1	30.46	29.76	27.76	29.27	29.07	52.55	28.22	90.76
mir-194	4456	987	3918	2876	3712	2516	7630	3732	3406	1060	241.89	92.63	237.72	170.51	212.03	174.95	224.49	227.76	211.73	95.82
mir-1949	13	7	14	16	10	14	24	4	7	10	0.71	0.66	0.85	0.95	0.57	0.97	0.71	0.24	0.44	0.9
mir-195	125	47	116	116	68	106	184	54	65	50	6.79	4.41	7.04	6.88	3.88	7.37	5.41	3.3	4.04	4.52
mir-196	275	78	206	144	90	131	296	49	76	82	14.93	7.32	12.5	8.54	5.14	9.11	8.71	2.99	4.72	7.41
mir-197	1539	2500	1432	1332	1462	1133	2894	1940	1324	2694	83.54	234.63	86.88	78.97	83.51	78.79	85.15	118.4	82.3	243.53
mir-1983	150	62	146	56	46	49	192	57	49	56	8.14	5.82	8.86	3.32	2.63	3.41	5.65	3.48	3.05	5.06
mir-199	587	1102	554	980	564	858	1118	420	543	1096	31.87	103.43	33.61	58.1	32.22	59.66	32.89	25.63	33.75	99.08
mir-20	14341	7819	12868	13864	14432	11690	27300	9386	13284	8154	778.5	733.84	780.74	821.96	824.36	812.88	803.21	572.82	825.77	737.11
mir-200	706	429	622	770	644	671	1266	681	563	488	38.33	40.26	37.74	45.65	36.79	46.66	37.25	41.56	35	44.11
mir-202	0	0	0	4	0	2	0	3	0	0	0	0	0	0.24	0	0.14	0	0.18	0	0
mir-203	0	3	0	0	0	1	0	0	0	0	0	0.28	0	0	0	0.07	0	0	0	0
mir-204	142	145	138	336	94	285	232	56	75	168	7.71	13.61	8.37	19.92	5.37	19.82	6.83	3.42	4.66	15.19
mir-205	18	13	14	2	2	3	16	2	2	14	0.98	1.22	0.85	0.12	0.11	0.21	0.47	0.12	0.12	1.27
mir-206	3	8	4	0	8	2	12	7	7	8	0.16	0.75	0.24	0	0.46	0.14	0.35	0.43	0.44	0.72
mir-21	7427528	2027879	6646978	7025560	9305744	5989062	15952722	6743615	8549683	2106070	403000	190000	403000	417000	532000	416000	469000	412000	531000	190000
mir-210	155	30	122	128	290	114	412	575	266	30	8.41	2.82	7.4	7.59	16.56	7.93	12.12	35.09	16.54	2.71
mir-211	4466	1957	3874	1426	1050	1239	4924	541	885	2110	242.44	183.67	235.05	84.54	59.98	86.16	144.87	33.02	55.01	190.74
mir-212	33	32	26	40	24	33	50	10	18	20	1.79	3	1.58	2.37	1.37	2.29	1.47	0.61	1.12	1.81
mir-214	53	47	32	20	22	22	54	19	13	44	2.88	4.41	1.94	1.19	1.26	1.53	1.59	1.16	0.81	3.98
mir-215	1622	241	1442	1002	1288	868	2730	3887	1221	304	88.05	22.62	87.49	59.41	73.57	60.36	80.32	237.22	75.9	27.48
mir-216	0	0	0	0	0	0	0	1	2	0	0	0	0	0	0	0	0	0.06	0.12	0
mir-217	0	2	0	0	0	0	0	0	0	2	0	0.19	0	0	0	0	0	0	0	0.18
mir-218	405	350	408	418	450	353	858	603	404	388	21.99	32.85	24.75	24.78	25.7	24.55	25.24	36.8	25.11	35.07
mir-219	92	105	80	114	90	98	170	142	83	110	4.99	9.85	4.85	6.76	5.14	6.81	5	8.67	5.16	9.94
mir-22	72565	48517	64684	61744	28590	52474	93274	15286	26288	50862	3939.18	4553.5	3924.58	3660.62	1633.06	3648.87	2744.26	932.89	1634.13	4597.87
mir-221	27976	7192	25232	11026	6632	9488	31864	5082	6084	7398	1518.67	675	1530.9	653.7	378.82	659.76	937.49	310.15	378.2	668.77
mir-222	11707	17025	10358	7096	2392	6161	12750	1850	2246	17898	635.51	1597.86	628.45	420.7	136.63	428.42	375.12	112.9	139.62	1617.96
mir-223	86798	11302	77970	32236	44390	27323	122360	23799	40662	11608	4711.81	1060.73	4730.68	1911.18	2535.55	1899.95	3600.01	1452.44	2527.65	1049.35
mir-224	105	49	92	58	4	52	96	29	7	56	5.7	4.6	5.58	3.44	0.23	3.62	2.82	1.77	0.44	5.06
mir-2284	9597	4535	8474	7752	5152	6641	13626	9803	4766	4558	520.97	425.63	514.14	459.59	294.28	461.79	400.9	598.27	296.27	412.04
mir-2285	9793	4233	8668	10042	8330	8626	16998	7102	7609	4422	531.61	397.28	525.91	595.36	475.81	599.82	500.11	433.43	472.99	399.74
mir-2290	2	0	0	4	0	2	0	0	0	0	0.11	0	0	0.24	0	0.14	0	0	0	0
mir-2299	39	17	40	12	10	12	50	8	8	26	2.12	1.6	2.43	0.71	0.57	0.83	1.47	0.49	0.5	2.35
mir-23	53069	5409	47492	16210	20066	13855	67558	11223	18203	5686	2880.84	507.65	2881.49	961.04	1146.17	963.43	1987.65	684.93	1131.55	514.01
mir-2312	5	17	4	22	8	14	12	19	7	10	0.27	1.6	0.24	1.3	0.46	0.97	0.35	1.16	0.44	0.9
mir-2318	73	11	62	116	96	87	158	80	84	20	3.96	1.03	3.76	6.88	5.48	6.05	4.65	4.88	5.22	1.81
mir-2320	0	0	0	2	0	1	0	0	1	0	0	0	0	0.12	0	0.07	0	0	0.06	0
mir-2331	43	20	24	34	16	29	40	20	16	14	2.33	1.88	1.46	2.02	0.91	2.02	1.18	1.22	0.99	1.27
mir-2332	542	799	468	168	268	181	736	274	247	812	29.42	74.99	28.39	9.96	15.31	12.59	21.65	16.72	15.35	73.4
mir-2335	5	0	8	0	0	1	8	6	1	0	0.27	0	0.49	0	0	0.07	0.24	0.37	0.06	0
mir-2336	2	0	2	0	0	0	2	0	0	0	0.11	0	0.12	0	0	0	0.06	0	0	0
mir-235	259	185	266	108	62	100	328	44	60	218	14.06	17.36	16.14	6.4	3.54	6.95	9.65	2.69	3.73	19.71
mir-2355	244	66	200	272	146	234	346	142	124	70	13.25	6.19	12.13	16.13	8.34	16.27	10.18	8.67	7.71	6.33
mir-2363	0	0	0	0	0	0	0	2	0	0	0	0	0	0	0	0	0	0.12	0	0
mir-2366	7	36	10	2	0	2	10	0	0	44	0.38	3.38	0.61	0.12	0	0.14	0.29	0	0	3.98
mir-2370	2	4	2	0	6	0	8	0	3	2	0.11	0.38	0.12	0	0.34	0	0.24	0	0.19	0.18
mir-2377	4	14	2	2	0	1	2	1	0	22	0.22	1.31	0.12	0.12	0	0.07	0.06	0.06	0	1.99
mir-2378	0	1	0	0	0	0	0	0	0	2	0	0.09	0	0	0	0	0	0	0	0.18
mir-2384	3	0	2	2	0	1	2	0	0	0	0.16	0	0.12	0.12	0	0.07	0.06	0	0	0
mir-2387	49	28	48	10	4	7	52	6	6	38	2.66	2.63	2.91	0.59	0.23	0.49	1.53	0.37	0.37	3.44
mir-2389	1	0	0	0	0	0	0	0	0	0	0.05	0	0	0	0	0	0	0	0	0
mir-2397	5	2	4	0	6	0	10	1	4	2	0.27	0.19	0.24	0	0.34	0	0.29	0.06	0.25	0.18
mir-24	97930	40546	87098	64440	46336	54626	133434	57472	42692	42368	5316.11	3805.39	5284.5	3820.46	2646.71	3798.51	3925.82	3507.47	2653.84	3830.02
mir-2402	1	1	0	0	0	0	0	0	0	0	0.05	0.09	0	0	0	0	0	0	0	0
mir-2403	1	7	0	0	0	0	0	3	0	10	0.05	0.66	0	0	0	0	0	0.18	0	0.9
mir-2404	25	6	18	18	14	18	32	18	11	6	1.36	0.56	1.09	1.07	0.8	1.25	0.94	1.1	0.68	0.54
mir-2411	214	466	212	222	134	236	346	254	122	508	11.62	43.74	12.86	13.16	7.65	16.41	10.18	15.5	7.58	45.92
mir-2415	0	3	0	0	6	1	6	0	3	6	0	0.28	0	0	0.34	0.07	0.18	0	0.19	0.54
mir-2419	9	45	6	4	10	8	16	10	11	48	0.49	4.22	0.36	0.24	0.57	0.56	0.47	0.61	0.68	4.34
mir-2422	1	2	0	0	0	0	0	0	0	0	0.05	0.19	0	0	0	0	0	0	0	0
mir-2424	43	121	46	24	38	21	84	57	27	104	2.33	11.36	2.79	1.42	2.17	1.46	2.47	3.48	1.68	9.4
mir-2431	4	5	2	2	0	2	2	1	0	0	0.22	0.47	0.12	0.12	0	0.14	0.06	0.06	0	0
mir-2432	1	5	0	0	0	0	0	0	0	2	0.05	0.47	0	0	0	0	0	0	0	0.18
mir-2435	3523	1745	3104	6194	7974	5315	11078	23084	7351	1764	191.25	163.77	188.33	367.22	455.47	369.59	325.93	1408.8	456.96	159.46
mir-2438	0	14	0	2	0	1	0	0	0	14	0	1.31	0	0.12	0	0.07	0	0	0	1.27
mir-2440	0	2	0	0	2	0	2	1	2	2	0	0.19	0	0	0.11	0	0.06	0.06	0.12	0.18
mir-2446	8	3	8	8	10	6	18	12	8	2	0.43	0.28	0.49	0.47	0.57	0.42	0.53	0.73	0.5	0.18
mir-2447	4	1	2	8	2	4	4	1	2	2	0.22	0.09	0.12	0.47	0.11	0.28	0.12	0.06	0.12	0.18
mir-2448	2	1	0	0	0	1	0	0	0	2	0.11	0.09	0	0	0	0.07	0	0	0	0.18
mir-2461	0	0	0	0	0	0	0	2	0	0	0	0	0	0	0	0	0	0.12	0	0
mir-2468	260	77	250	782	860	642	1110	284	775	64	14.11	7.23	15.17	46.36	49.12	44.64	32.66	17.33	48.18	5.79
mir-2469	0	0	0	0	0	0	0	1	0	0	0	0	0	0	0	0	0	0.06	0	0
mir-2474	1	8	0	0	0	1	0	0	0	2	0.05	0.75	0	0	0	0.07	0	0	0	0.18
mir-2475	12	14	10	6	0	3	10	1	2	12	0.65	1.31	0.61	0.36	0	0.21	0.29	0.06	0.12	1.08
mir-2477	0	3	0	0	10	2	10	0	5	4	0	0.28	0	0	0.57	0.14	0.29	0	0.31	0.36
mir-2478	6977	3431	6034	3448	4260	2963	10294	9971	3851	3526	378.75	322.01	366.1	204.42	243.33	206.04	302.86	608.52	239.39	318.75
mir-2483	279	73	254	32	86	28	340	57	83	60	15.15	6.85	15.41	1.9	4.91	1.95	10	3.48	5.16	5.42
mir-2484	0	1	0	0	0	0	0	2	1	2	0	0.09	0	0	0	0	0	0.12	0.06	0.18
mir-2485	0	0	0	0	0	0	0	1	0	0	0	0	0	0	0	0	0	0.06	0	0
mir-25	119234	88865	106488	84266	88798	72190	195286	147793	81858	92242	6472.59	8340.31	6460.95	4995.89	5072.14	5019.85	5745.6	9019.7	5088.5	8338.57
mir-26	2158281	991823	1932282	1927106	1029444	1644513	2961726	1051467	945747	1028700	117000	93100	117000	114000	58800	114000	87100	64200	58800	93000
mir-27	210253	88003	188334	150604	80452	128494	268786	54560	73808	91710	11400	8259.41	11400	8928.87	4595.41	8935.04	7908.08	3329.76	4588.09	8290.48
mir-28	13148	5948	11842	7944	5186	6813	17028	4633	4878	6198	713.74	558.24	718.49	470.98	296.22	473.75	500.99	282.75	303.23	560.29
mir-2887	2	0	0	0	0	0	0	1	0	0	0.11	0	0	0	0	0	0	0.06	0	0
mir-29	37645	15841	33532	41282	36626	35085	70158	46807	33456	16588	2043.55	1486.74	2034.49	2447.49	2092.08	2439.69	2064.15	2856.6	2079.71	1499.54
mir-2903	0	0	0	0	0	1	0	3	1	0	0	0	0	0	0	0.07	0	0.18	0.06	0
mir-2904	0	0	0	0	2	0	2	0	1	0	0	0	0	0	0.11	0	0.06	0	0.06	0
mir-296	883	1860	802	566	184	511	986	138	208	2016	47.93	174.57	48.66	33.56	10.51	35.53	29.01	8.42	12.93	182.24
mir-298	0	1	0	0	0	0	0	0	0	2	0	0.09	0	0	0	0	0	0	0	0.18
mir-299	59	156	52	96	70	70	122	48	58	158	3.2	14.64	3.15	5.69	4	4.87	3.59	2.93	3.61	14.28
mir-30	417191	362128	372960	439154	369804	373447	742764	356867	340516	375096	22600	34000	22600	26000	21100	26000	21900	21800	21200	33900
mir-301	226	73	158	174	128	140	286	119	113	80	12.27	6.85	9.59	10.32	7.31	9.74	8.41	7.26	7.02	7.23
mir-3059	1	1	0	0	0	1	0	2	0	2	0.05	0.09	0	0	0	0.07	0	0.12	0	0.18
mir-3064	14	17	18	10	4	12	22	7	7	12	0.76	1.6	1.09	0.59	0.23	0.83	0.65	0.43	0.44	1.08
mir-3074	2	0	0	0	0	0	0	0	0	0	0.11	0	0	0	0	0	0	0	0	0
mir-31	172	71	138	100	48	82	186	9	44	64	9.34	6.66	8.37	5.93	2.74	5.7	5.47	0.55	2.74	5.79
mir-3120	49	62	30	18	14	20	44	9	11	60	2.66	5.82	1.82	1.07	0.8	1.39	1.29	0.55	0.68	5.42
mir-3141	0	0	0	0	0	0	0	1	0	0	0	0	0	0	0	0	0	0.06	0	0
mir-32	2723	455	2494	6590	9480	5651	11974	24492	8671	438	147.82	42.7	151.32	390.7	541.5	392.95	352.29	1494.73	539.01	39.59
mir-320	7039	11797	6380	4564	2216	3880	8596	1997	2010	12300	382.11	1107.19	387.09	270.59	126.58	269.8	252.91	121.88	124.95	1111.91
mir-322	0	0	0	0	12	0	12	1	7	0	0	0	0	0	0.69	0	0.35	0.06	0.44	0
mir-323	10	10	6	28	22	19	28	15	15	10	0.54	0.94	0.36	1.66	1.26	1.32	0.82	0.92	0.93	0.9
mir-324	108	16	100	50	164	47	264	86	139	16	5.86	1.5	6.07	2.96	9.37	3.27	7.77	5.25	8.64	1.45
mir-325	2	2	2	2	4	1	6	4	2	2	0.11	0.19	0.12	0.12	0.23	0.07	0.18	0.24	0.12	0.18
mir-326	273	203	258	258	416	208	674	904	366	226	14.82	19.05	15.65	15.3	23.76	14.46	19.83	55.17	22.75	20.43
mir-328	928	2266	736	530	274	468	1010	169	252	2254	50.38	212.67	44.66	31.42	15.65	32.54	29.72	10.31	15.66	203.76
mir-329	0	1	0	4	4	2	4	0	3	0	0	0.09	0	0.24	0.23	0.14	0.12	0	0.19	0
mir-33	101	15	80	110	220	95	300	489	242	6	5.48	1.41	4.85	6.52	12.57	6.61	8.83	29.84	15.04	0.54
mir-330	3145	1545	2854	1408	868	1123	3722	669	763	1614	170.73	145	173.16	83.48	49.58	78.09	109.51	40.83	47.43	145.9
mir-331	518	259	458	336	512	290	970	516	424	308	28.12	24.31	27.79	19.92	29.25	20.17	28.54	31.49	26.36	27.84
mir-335	52	34	48	12	40	7	88	10	34	36	2.82	3.19	2.91	0.71	2.28	0.49	2.59	0.61	2.11	3.25
mir-338	1005	511	952	580	198	472	1150	73	221	510	54.56	47.96	57.76	34.39	11.31	32.82	33.83	4.46	13.74	46.1
mir-339	10573	6057	9632	5588	7464	4779	17096	5111	6829	6406	573.95	568.47	584.4	331.3	426.34	332.32	502.99	311.92	424.51	579.09
mir-34	176	113	178	452	412	366	590	196	380	116	9.55	10.61	10.8	26.8	23.53	25.45	17.36	11.96	23.62	10.49
mir-340	15012	5272	13392	20120	16582	17128	29974	16058	15426	5476	814.92	494.8	812.53	1192.86	947.16	1191.02	881.88	980.01	958.92	495.02
mir-342	11591	3693	10454	11800	15466	10180	25920	22327	14070	3784	629.22	346.6	634.28	699.59	883.42	707.88	762.6	1362.6	874.63	342.07
mir-3431	69	33	48	46	12	37	60	42	13	40	3.75	3.1	2.91	2.73	0.69	2.57	1.77	2.56	0.81	3.62
mir-3432	4974	5545	4574	4402	1944	3659	6518	898	1749	5770	270.01	520.42	277.52	260.98	111.04	254.43	191.77	54.8	108.72	521.6
mir-345	348	133	276	230	332	186	608	243	306	156	18.89	12.48	16.75	13.64	18.96	12.93	17.89	14.83	19.02	14.1
mir-352	4	0	0	20	12	12	12	4	7	0	0.22	0	0	1.19	0.69	0.83	0.35	0.24	0.44	0
mir-3535	151	33	148	62	90	61	238	215	81	34	8.2	3.1	8.98	3.68	5.14	4.24	7	13.12	5.04	3.07
mir-3548	1	0	0	2	6	2	6	0	3	0	0.05	0	0	0.12	0.34	0.14	0.18	0	0.19	0
mir-3604	1	0	2	0	0	0	2	0	0	0	0.05	0	0.12	0	0	0	0.06	0	0	0
mir-361	13255	9884	11870	12908	10020	10904	21890	12643	9133	10130	719.55	927.65	720.19	765.28	572.34	758.23	644.04	771.59	567.73	915.74
mir-3613	329	22	254	906	1570	733	1824	1844	1426	18	17.86	2.06	15.41	53.71	89.68	50.97	53.66	112.54	88.64	1.63
mir-362	1034	420	930	472	416	400	1346	269	393	426	56.13	39.42	56.43	27.98	23.76	27.81	39.6	16.42	24.43	38.51
mir-3620	1	0	2	0	0	0	2	1	0	0	0.05	0	0.12	0	0	0	0.06	0.06	0	0
mir-363	1154	461	988	1020	1830	879	2818	2098	1735	474	62.64	43.27	59.94	60.47	104.53	61.12	82.91	128.04	107.85	42.85
mir-365	454	157	376	218	232	183	608	397	213	166	24.65	14.74	22.81	12.92	13.25	12.73	17.89	24.23	13.24	15.01
mir-3662	0	0	0	0	0	2	0	0	0	0	0	0	0	0	0	0.14	0	0	0	0
mir-369	25	15	20	82	76	69	96	85	63	10	1.36	1.41	1.21	4.86	4.34	4.8	2.82	5.19	3.92	0.9
mir-370	25	26	20	28	44	28	64	37	41	26	1.36	2.44	1.21	1.66	2.51	1.95	1.88	2.26	2.55	2.35
mir-371	7	5	4	4	2	2	6	4	3	6	0.38	0.47	0.24	0.24	0.11	0.14	0.18	0.24	0.19	0.54
mir-374	35500	10196	31986	25052	25046	21288	57032	28266	23157	10444	1927.11	956.93	1940.69	1485.26	1430.63	1480.3	1677.96	1725.05	1439.5	944.13
mir-375	340	225	288	1834	2430	1633	2718	10305	2280	240	18.46	21.12	17.47	108.73	138.8	113.55	79.97	628.91	141.73	21.7
mir-376	1	0	2	6	14	5	16	20	17	0	0.05	0	0.12	0.36	0.8	0.35	0.47	1.22	1.06	0
mir-377	1	0	2	0	0	3	2	2	0	0	0.05	0	0.12	0	0	0.21	0.06	0.12	0	0
mir-378	17315	9969	15454	16020	13342	13631	28796	14999	12252	10364	939.94	935.63	937.64	949.78	762.09	947.85	847.22	915.38	761.62	936.89
mir-379	372	350	350	2418	2160	2042	2510	3205	1934	386	20.19	32.85	21.24	143.36	123.38	141.99	73.85	195.6	120.22	34.89
mir-380	16	10	14	16	28	18	42	61	24	10	0.87	0.94	0.85	0.95	1.6	1.25	1.24	3.72	1.49	0.9
mir-381	114	195	100	304	288	275	388	379	251	200	6.19	18.3	6.07	18.02	16.45	19.12	11.42	23.13	15.6	18.08
mir-382	34	41	28	52	48	51	76	41	44	42	1.85	3.85	1.7	3.08	2.74	3.55	2.24	2.5	2.74	3.8
mir-383	67	70	52	148	26	128	78	6	16	82	3.64	6.57	3.15	8.77	1.49	8.9	2.29	0.37	0.99	7.41
mir-3956	0	8	0	0	0	0	0	2	1	6	0	0.75	0	0	0	0	0	0.12	0.06	0.54
mir-3958	88	109	90	1132	490	989	580	469	424	116	4.78	10.23	5.46	67.11	27.99	68.77	17.06	28.62	26.36	10.49
mir-3959	27	8	20	94	44	86	64	29	42	8	1.47	0.75	1.21	5.57	2.51	5.98	1.88	1.77	2.61	0.72
mir-409	74	146	72	370	180	345	252	332	180	150	4.02	13.7	4.37	21.94	10.28	23.99	7.41	20.26	11.19	13.56
mir-410	9	4	8	16	12	13	20	16	15	0	0.49	0.38	0.49	0.95	0.69	0.9	0.59	0.98	0.93	0
mir-411	560	425	510	5570	5354	4800	5864	7262	4963	430	30.4	39.89	30.94	330.23	305.82	333.78	172.53	443.19	308.51	38.87
mir-412	1	1	0	16	8	14	8	14	7	0	0.05	0.09	0	0.95	0.46	0.97	0.24	0.85	0.44	0
mir-421	1448	742	1324	668	590	586	1914	296	510	754	78.6	69.64	80.33	39.6	33.7	40.75	56.31	18.06	31.7	68.16
mir-422	0	0	0	0	2	0	2	0	1	0	0	0	0	0	0.11	0	0.06	0	0.06	0
mir-423	81680	331962	73458	82684	35204	70670	108662	28665	32400	343398	4433.98	31200	4456.92	4902.09	2010.85	4914.16	3196.99	1749.4	2014.07	31000
mir-424	44	60	26	42	88	37	114	32	80	76	2.39	5.63	1.58	2.49	5.03	2.57	3.35	1.95	4.97	6.87
mir-425	23968	9057	21492	15394	16960	13117	38452	20258	15618	9538	1301.1	850.03	1303.99	912.67	968.75	912.11	1131.31	1236.33	970.85	862.22
mir-429	0	1	0	2	2	4	2	4	2	0	0	0.09	0	0.12	0.11	0.28	0.06	0.24	0.12	0
mir-431	1	4	2	2	0	1	2	4	0	2	0.05	0.38	0.12	0.12	0	0.07	0.06	0.24	0	0.18
mir-432	7	10	2	8	4	5	6	4	3	16	0.38	0.94	0.12	0.47	0.23	0.35	0.18	0.24	0.19	1.45
mir-433	13	21	14	6	4	9	18	5	3	24	0.71	1.97	0.85	0.36	0.23	0.63	0.53	0.31	0.19	2.17
mir-4334	6648	4924	5990	3480	3720	2988	9710	2664	3366	5236	360.89	462.14	363.43	206.32	212.49	207.78	285.68	162.58	209.24	473.33
mir-4454	16	1	10	8	12	8	22	65	11	2	0.87	0.09	0.61	0.47	0.69	0.56	0.65	3.97	0.68	0.18
mir-448	1	2	2	0	0	0	2	2	0	2	0.05	0.19	0.12	0	0	0	0.06	0.12	0	0.18
mir-449	2	0	2	4	6	3	8	1	4	0	0.11	0	0.12	0.24	0.34	0.21	0.24	0.06	0.25	0
mir-450	513	154	444	578	852	553	1296	315	723	182	27.85	14.45	26.94	34.27	48.67	38.45	38.13	19.22	44.94	16.45
mir-4507	0	0	0	4	0	4	0	4	1	0	0	0	0	0.24	0	0.28	0	0.24	0.06	0
mir-451	618244	835504	552176	535182	1057572	456247	1609748	1011368	971314	868904	33600	78400	33500	31700	60400	31700	47400	61700	60400	78500
mir-452	44	15	34	38	2	34	36	11	2	20	2.39	1.41	2.06	2.25	0.11	2.36	1.06	0.67	0.12	1.81
mir-454	1238	374	1056	726	652	632	1708	699	630	392	67.2	35.1	64.07	43.04	37.24	43.95	50.25	42.66	39.16	35.44
mir-455	88	72	80	132	120	111	200	28	110	82	4.78	6.76	4.85	7.83	6.85	7.72	5.88	1.71	6.84	7.41
mir-4657	0	0	0	0	0	0	0	2	0	0	0	0	0	0	0	0	0	0.12	0	0
mir-4680	1	0	2	0	0	0	2	0	0	0	0.05	0	0.12	0	0	0	0.06	0	0	0
mir-483	0	0	0	0	2	0	2	0	1	0	0	0	0	0	0.11	0	0.06	0	0.06	0
mir-484	1195	1575	1026	756	740	652	1766	672	630	1632	64.87	147.82	62.25	44.82	42.27	45.34	51.96	41.01	39.16	147.53
mir-485	5	21	4	20	20	15	24	13	16	16	0.27	1.97	0.24	1.19	1.14	1.04	0.71	0.79	0.99	1.45
mir-486	78817	386064	70106	38556	26314	32469	96420	18903	24323	401998	4278.57	36200	4253.55	2285.87	1503.05	2257.79	2836.82	1153.64	1511.98	36300
mir-487	6	1	2	16	16	17	18	22	14	0	0.33	0.09	0.12	0.95	0.91	1.18	0.53	1.34	0.87	0
mir-488	8	0	8	6	8	5	16	8	5	0	0.43	0	0.49	0.36	0.46	0.35	0.47	0.49	0.31	0
mir-490	2	5	0	0	4	0	4	2	3	8	0.11	0.47	0	0	0.23	0	0.12	0.12	0.19	0.72
mir-491	35	11	26	18	36	13	62	37	28	6	1.9	1.03	1.58	1.07	2.06	0.9	1.82	2.26	1.74	0.54
mir-493	47	168	44	204	108	176	152	198	121	194	2.55	15.77	2.67	12.09	6.17	12.24	4.47	12.08	7.52	17.54
mir-494	22	12	18	120	104	109	122	49	97	12	1.19	1.13	1.09	7.11	5.94	7.58	3.59	2.99	6.03	1.08
mir-495	26	22	20	32	24	26	44	45	23	32	1.41	2.06	1.21	1.9	1.37	1.81	1.29	2.75	1.43	2.89
mir-496	2	0	2	4	0	2	2	1	0	0	0.11	0	0.12	0.24	0	0.14	0.06	0.06	0	0
mir-497	59	13	54	22	50	18	104	12	35	12	3.2	1.22	3.28	1.3	2.86	1.25	3.06	0.73	2.18	1.08
mir-499	918	772	852	934	446	819	1298	542	391	794	49.83	72.46	51.69	55.37	25.48	56.95	38.19	33.08	24.31	71.78
mir-500	1204	556	1064	602	704	550	1768	648	648	506	65.36	52.18	64.56	35.69	40.21	38.25	52.02	39.55	40.28	45.74
mir-502	892	378	786	402	508	367	1294	421	457	354	48.42	35.48	47.69	23.83	29.02	25.52	38.07	25.69	28.41	32
mir-503	12	17	12	12	14	10	26	3	12	16	0.65	1.6	0.73	0.71	0.8	0.7	0.76	0.18	0.75	1.45
mir-504	14	25	14	12	2	13	16	4	3	18	0.76	2.35	0.85	0.71	0.11	0.9	0.47	0.24	0.19	1.63
mir-505	897	822	812	1088	520	912	1332	437	466	826	48.69	77.15	49.27	64.5	29.7	63.42	39.19	26.67	28.97	74.67
mir-5100	10	15	10	0	4	1	14	9	2	20	0.54	1.41	0.61	0	0.23	0.07	0.41	0.55	0.12	1.81
mir-532	30947	17234	27536	18204	12716	15734	40252	13016	11765	18020	1679.95	1617.47	1670.69	1079.26	726.34	1094.09	1184.27	794.36	731.34	1628.99
mir-539	1	6	0	0	2	0	2	1	3	8	0.05	0.56	0	0	0.11	0	0.06	0.06	0.19	0.72
mir-542	120	34	96	122	400	101	496	180	361	34	6.51	3.19	5.82	7.23	22.85	7.02	14.59	10.99	22.44	3.07
mir-543	12	36	8	64	30	48	38	16	22	44	0.65	3.38	0.49	3.79	1.71	3.34	1.12	0.98	1.37	3.98
mir-544	0	0	0	2	2	1	2	2	3	0	0	0	0	0.12	0.11	0.07	0.06	0.12	0.19	0
mir-545	1	0	0	2	10	1	10	4	8	0	0.05	0	0	0.12	0.57	0.07	0.29	0.24	0.5	0
mir-548	2	1	2	4	4	4	6	4	4	0	0.11	0.09	0.12	0.24	0.23	0.28	0.18	0.24	0.25	0
mir-574	526	820	462	530	344	478	806	381	294	912	28.55	76.96	28.03	31.42	19.65	33.24	23.71	23.25	18.28	82.44
mir-576	0	0	0	0	2	0	2	0	2	0	0	0	0	0	0.11	0	0.06	0	0.12	0
mir-582	113	22	88	44	54	35	142	20	50	16	6.13	2.06	5.34	2.61	3.08	2.43	4.18	1.22	3.11	1.45
mir-592	0	1	0	6	10	6	10	20	7	0	0	0.09	0	0.36	0.57	0.42	0.29	1.22	0.44	0
mir-599	2	0	4	2	4	2	8	0	2	0	0.11	0	0.24	0.12	0.23	0.14	0.24	0	0.12	0
mir-6119	3443	1852	3140	3982	2896	3363	6036	1940	2562	1916	186.9	173.82	190.51	236.08	165.42	233.85	177.59	118.4	159.26	173.2
mir-6123	136	45	98	58	88	43	186	180	102	52	7.38	4.22	5.95	3.44	5.03	2.99	5.47	10.99	6.34	4.7
mir-615	8	9	10	4	6	5	16	4	5	4	0.43	0.84	0.61	0.24	0.34	0.35	0.47	0.24	0.31	0.36
mir-6240	2	0	2	0	4	0	6	1	2	0	0.11	0	0.12	0	0.23	0	0.18	0.06	0.12	0
mir-628	266	113	204	192	128	158	332	107	111	112	14.44	10.61	12.38	11.38	7.31	10.99	9.77	6.53	6.9	10.12
mir-6341	0	0	0	0	4	0	4	0	2	0	0	0	0	0	0.23	0	0.12	0	0.12	0
mir-6481	1	0	0	0	0	0	0	0	0	0	0.05	0	0	0	0	0	0	0	0	0
mir-6501	0	1	0	8	10	4	10	0	7	2	0	0.09	0	0.47	0.57	0.28	0.29	0	0.44	0.18
mir-6506	0	0	0	0	0	0	0	1	0	0	0	0	0	0	0	0	0	0.06	0	0
mir-6516	72	19	60	40	64	44	124	56	54	22	3.91	1.78	3.64	2.37	3.66	3.06	3.65	3.42	3.36	1.99
mir-6517	182	377	174	178	100	170	274	82	88	348	9.88	35.38	10.56	10.55	5.71	11.82	8.06	5	5.47	31.46
mir-652	7186	3427	6442	4084	2688	3399	9130	1908	2468	3668	390.09	321.64	390.86	242.13	153.54	236.36	268.62	116.44	153.42	331.58
mir-6520	35	10	36	12	30	13	66	20	23	8	1.9	0.94	2.18	0.71	1.71	0.9	1.94	1.22	1.43	0.72
mir-6524	0	0	0	0	2	0	2	0	1	0	0	0	0	0	0.11	0	0.06	0	0.06	0
mir-6527	15	2	16	8	4	8	20	10	3	2	0.81	0.19	0.97	0.47	0.23	0.56	0.59	0.61	0.19	0.18
mir-6529	4800	5885	4336	2386	654	2098	4990	626	600	6222	260.57	552.33	263.08	141.46	37.36	145.89	146.81	38.2	37.3	562.46
mir-6534	3	11	4	6	0	3	4	0	0	8	0.16	1.03	0.24	0.36	0	0.21	0.12	0	0	0.72
mir-6535	10	2	8	0	0	0	8	3	0	2	0.54	0.19	0.49	0	0	0	0.24	0.18	0	0.18
mir-6536	9	3	10	6	2	3	12	6	2	6	0.49	0.28	0.61	0.36	0.11	0.21	0.35	0.37	0.12	0.54
mir-654	1	5	0	18	2	10	2	3	2	4	0.05	0.47	0	1.07	0.11	0.7	0.06	0.18	0.12	0.36
mir-655	1	0	0	4	6	6	6	9	8	0	0.05	0	0	0.24	0.34	0.42	0.18	0.55	0.5	0
mir-660	13356	5454	12056	6662	4930	5659	16986	3679	4417	5636	725.03	511.88	731.47	394.97	281.6	393.51	499.75	224.53	274.57	509.49
mir-664	2079	522	1976	1140	1028	955	3004	970	989	538	112.86	48.99	119.89	67.59	58.72	66.41	88.38	59.2	61.48	48.63
mir-665	0	3	0	0	0	0	0	0	1	4	0	0.28	0	0	0	0	0	0	0.06	0.36
mir-6651	1	0	0	4	0	2	0	0	0	0	0.05	0	0	0.24	0	0.14	0	0	0	0
mir-668	0	3	0	0	0	0	0	0	0	4	0	0.28	0	0	0	0	0	0	0	0.36
mir-670	1	0	2	0	0	0	2	2	0	0	0.05	0	0.12	0	0	0	0.06	0.12	0	0
mir-671	205	356	190	308	86	249	276	167	93	340	11.13	33.41	11.53	18.26	4.91	17.31	8.12	10.19	5.78	30.74
mir-6715	3	0	2	0	0	0	2	0	2	0	0.16	0	0.12	0	0	0	0.06	0	0.12	0
mir-677	13	2	12	6	8	6	20	18	13	2	0.71	0.19	0.73	0.36	0.46	0.42	0.59	1.1	0.81	0.18
mir-7	29153	20962	25984	92320	83944	78525	109928	78878	76623	21750	1582.56	1967.36	1576.53	5473.38	4794.88	5460.37	3234.24	4813.87	4763.08	1966.17
mir-708	18	4	12	8	12	9	24	5	11	4	0.98	0.38	0.73	0.47	0.69	0.63	0.71	0.31	0.68	0.36
mir-7178	1	0	2	12	4	6	6	12	7	0	0.05	0	0.12	0.71	0.23	0.42	0.18	0.73	0.44	0
mir-7180	42	75	40	46	14	49	54	43	13	64	2.28	7.04	2.43	2.73	0.8	3.41	1.59	2.62	0.81	5.79
mir-744	6461	9312	5752	4842	1988	4109	7740	1554	1793	9812	350.73	873.97	348.99	287.07	113.55	285.73	227.72	94.84	111.46	886.99
mir-7565	2	0	0	0	0	0	0	0	0	0	0.11	0	0	0	0	0	0	0	0	0
mir-758	5	1	4	6	4	6	8	0	5	0	0.27	0.09	0.24	0.36	0.23	0.42	0.24	0	0.31	0
mir-760	175	648	148	96	26	86	174	8	20	678	9.5	60.82	8.98	5.69	1.49	5.98	5.12	0.49	1.24	61.29
mir-767	0	0	0	2	0	2	0	2	0	0	0	0	0	0.12	0	0.14	0	0.12	0	0
mir-769	1450	1115	1228	1046	1082	872	2310	853	945	1160	78.71	104.65	74.51	62.01	61.8	60.64	67.96	52.06	58.74	104.86
mir-7857	120	166	104	66	16	60	120	24	18	166	6.51	15.58	6.31	3.91	0.91	4.17	3.53	1.46	1.12	15.01
mir-7859	91	80	58	132	42	110	100	62	40	94	4.94	7.51	3.52	7.83	2.4	7.65	2.94	3.78	2.49	8.5
mir-7862	12	4	10	10	10	6	20	2	7	4	0.65	0.38	0.61	0.59	0.57	0.42	0.59	0.12	0.44	0.36
mir-7863	0	3	0	2	2	2	2	0	2	2	0	0.28	0	0.12	0.11	0.14	0.06	0	0.12	0.18
mir-7865	3	1	2	0	0	1	2	2	0	2	0.16	0.09	0.12	0	0	0.07	0.06	0.12	0	0.18
mir-8072	1	0	2	0	0	0	2	0	0	0	0.05	0	0.12	0	0	0	0.06	0	0	0
mir-8117	1	0	2	0	0	0	2	0	0	0	0.05	0	0.12	0	0	0	0.06	0	0	0
mir-873	3	2	2	0	2	1	4	3	4	0	0.16	0.19	0.12	0	0.11	0.07	0.12	0.18	0.25	0
mir-874	30	48	36	28	20	33	56	49	20	54	1.63	4.5	2.18	1.66	1.14	2.29	1.65	2.99	1.24	4.88
mir-877	9	26	10	2	4	2	14	20	4	34	0.49	2.44	0.61	0.12	0.23	0.14	0.41	1.22	0.25	3.07
mir-885	0	0	0	0	2	0	2	0	1	0	0	0	0	0	0.11	0	0.06	0	0.06	0
mir-8858	2	1	4	0	0	0	4	16	1	2	0.11	0.09	0.24	0	0	0	0.12	0.98	0.06	0.18
mir-8903	5	7	8	0	10	0	18	2	8	2	0.27	0.66	0.49	0	0.57	0	0.53	0.12	0.5	0.18
mir-8986	178	267	142	174	62	157	204	108	69	266	9.66	25.06	8.62	10.32	3.54	10.92	6	6.59	4.29	24.05
mir-9	4644	2994	4292	3902	5086	3356	9378	7426	4583	3158	252.1	281	260.41	231.34	290.51	233.37	275.91	453.2	284.89	285.48
mir-92	49398	104041	44588	43706	24440	37211	69028	14371	22591	108228	2681.56	9764.63	2705.29	2591.2	1396.01	2587.53	2030.9	877.05	1404.31	9783.68
mir-9226	4	0	2	4	2	2	4	4	2	0	0.22	0	0.12	0.24	0.11	0.14	0.12	0.24	0.12	0
mir-9298	2396	2637	2224	1602	1390	1367	3614	4559	1310	2588	130.07	247.49	134.94	94.98	79.4	95.06	106.33	278.23	81.43	233.95
mir-93	34129	13863	30742	22568	22594	19155	53336	17798	20825	14258	1852.69	1301.09	1865.21	1337.99	1290.57	1331.97	1569.22	1086.2	1294.54	1288.91
mir-9341	1	0	0	0	0	0	0	0	0	0	0.05	0	0	0	0	0	0	0	0	0
mir-935	18	17	20	10	4	6	24	1	7	16	0.98	1.6	1.21	0.59	0.23	0.42	0.71	0.06	0.44	1.45
mir-95	4221	2260	3688	4888	3322	4105	7010	942	2997	2318	229.14	212.11	223.76	289.8	189.75	285.45	206.24	57.49	186.3	209.54
mir-96	9	13	2	4	18	3	20	6	10	16	0.49	1.22	0.12	0.24	1.03	0.21	0.59	0.37	0.62	1.45
mir-9651	0	0	0	0	2	0	2	0	1	0	0	0	0	0	0.11	0	0.06	0	0.06	0
mir-98	12437	5299	10922	10684	4652	9185	15574	4335	4543	5646	675.14	497.33	662.67	633.42	265.72	638.69	458.21	264.56	282.4	510.39
mir-9851	0	2	0	2	0	1	0	0	0	2	0	0.19	0	0.12	0	0.07	0	0	0	0.18
mir-99	56666	61009	50920	36862	16352	31520	67272	5745	14914	63072	3076.1	5725.92	3089.47	2185.44	934.03	2191.8	1979.24	350.61	927.09	5701.64
mir-9933	3039	4364	2870	2992	1770	2550	4640	2354	1637	4488	164.97	409.58	174.13	177.39	101.1	177.32	136.52	143.66	101.76	405.71
mir-9983	9	2	4	4	12	8	16	0	9	2	0.49	0.19	0.24	0.24	0.69	0.56	0.47	0	0.56	0.18
mir-9993	4072	10196	3598	4228	3022	3786	6620	8193	2726	10650	221.05	956.93	218.3	250.67	172.62	263.27	194.77	500.01	169.46	962.75

## Sheet: Supplementary Table S2
	R5069_1_total	R5069_1_distinct	R5069_2_total	R5069_2_distinct	R5195_1_total	R5195_1_distinct	R5195_2_total	R5195_2_distinct	R5248_1_total	R5248_1_distinct	R5248_2_total	R5248_2_distinct	R5332_1_total	R5332_1_distinct	R5332_2_total	R5332_2_distinct	R5380_1_total	R5380_2_distinct	R5380_2_total	R5380_2_distinct
Input Reads	25671071	512842	19716395	478695	22976014	283779	23390956	247135	23497362	239803	19931281	361715	46473376	458656	22402647	467273	21575816	375578	20485152	338675
Reads filter by sequence length	21534449	300158	13052257	240529	19271268	167023	19777614	138597	20574984	136905	16855202	201781	39846252	264962	20063887	305524	18890900	213301	13565014	170538
Reads filter by genome (matches in)	18421362	96568	10654881	83646	16481778	55415	16867076	44608	17507018	50154	14380905	63333	33988796	90042	16385579	122282	16086852	77834	11062090	62184
